# Supplementary material
Source: publisher site journal article supplement (https://www.dovepress.com/article/568358)

Supplement figure 1. Flow diagram of subjects included in the study

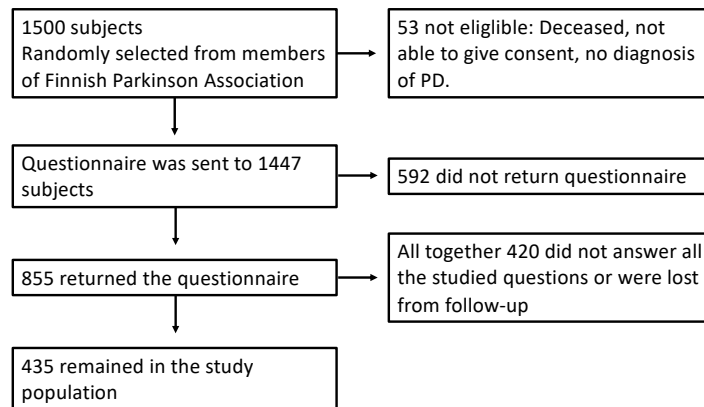

Supplement Table 1 Characteristics of included and excluded participants

|                                | Included<br>(n=435)   | Excluded<br>(number varies<br>due to missing<br>data) | P-value       |
|--------------------------------|-----------------------|-------------------------------------------------------|---------------|
| Age (years)                    | 67.7 (66.9-68.6)      | 70.2 (69.4-71.0)                                      | <b>0.0001</b> |
| Male gender (%)                | 54.7% (50.0-<br>59.4) | 54.4% (46.3-62.4)                                     | 0.92          |
| Duration of PD (years)         | 6.3 (5.9-6.7)         | 6.4 (5.9-6.9)                                         | 0.63          |
| LED (mg)                       | 646 (609-683)         | 614 (571-656)                                         | 0.35          |
| Depression (WHO5 ≤50) (%)      | 44.2% (39.4-<br>49.0) | 41.9 (37.0-47.0)                                      | 0.40          |
| Daily or almost daily naps (%) | 28.1 (24.0-32.6)      | 32.1 (27.4-37.1)                                      | 0.32          |
| Sleep duration (TST, h)        | 7.5 (7.4-7.7)         | 7.8 (7.6-7.9)                                         | 0.05          |
| Deceased                       | 22.8 (19.0-27.1)      | 17.6 (12.5-23.9)                                      | 0.16          |

PD: Parkinson disease; LED: Levodopa equivalent dose; WHO-5: WHO-5 well-being scale; TST: total nighttime sleep duration. P-value is calculated for difference between included and excluded subjects. **Statistically significant differences (P-value <0.05) are printed in bold.**

Supplement figure 2. Scaled Schoenfeld residual plot for age

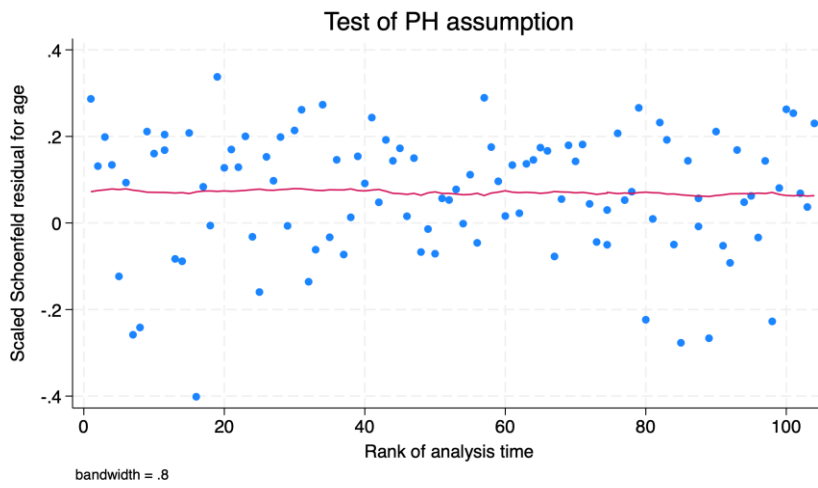

Supplement figure 3. Scaled Schoenfeld residual plot for gender

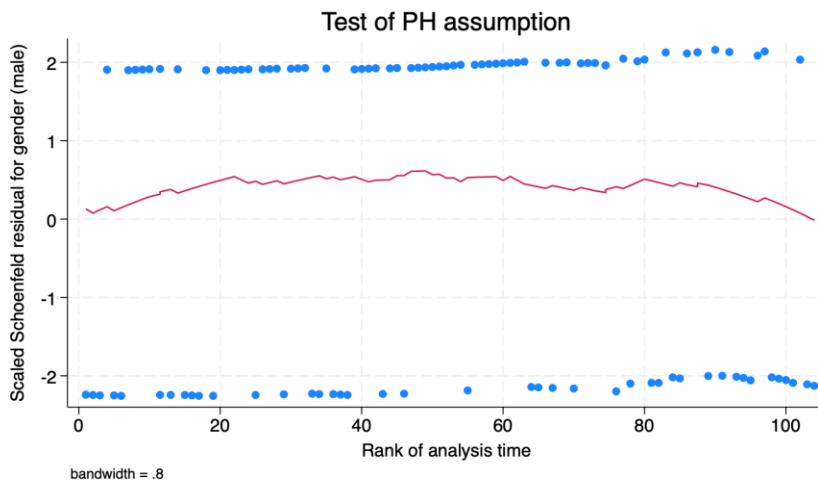

Supplement figure 4. Scaled Schoenfeld residual plot for BMI

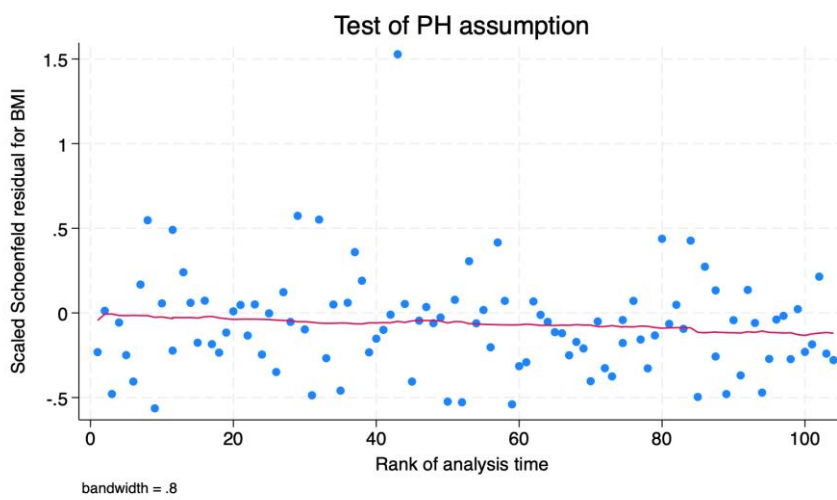

Supplement figure 5. Scaled Schoenfeld residual plot for sleep apnea (STOP $\geq$ 2)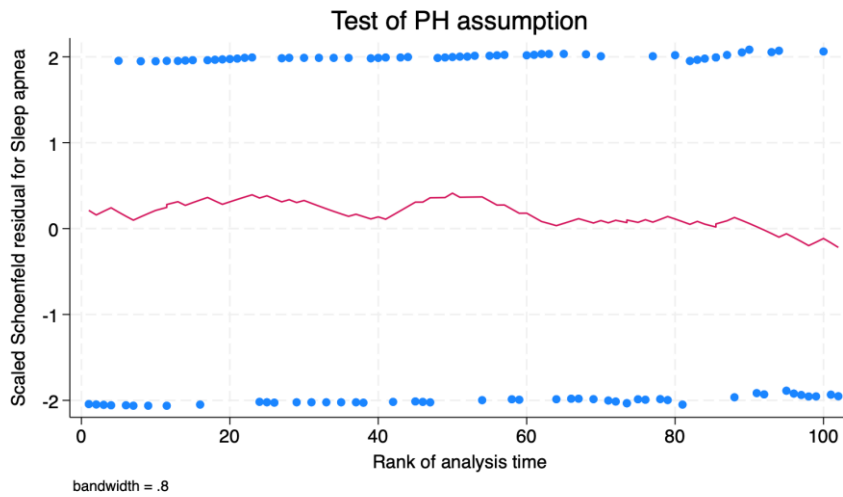

STOP: A sleep apnea questionnaire: Snoring, Tiredness, Observed apneas, high blood Pressure.

Supplement figure 6. Scaled Schoenfeld residual plot for RLS ( $\geq$ 3 d/w)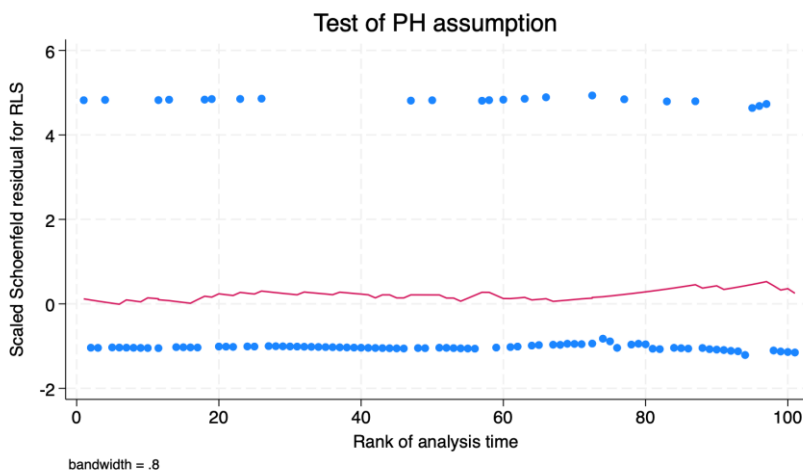

Supplement figure 7. Scaled Schoenfeld residual plot for PD duration

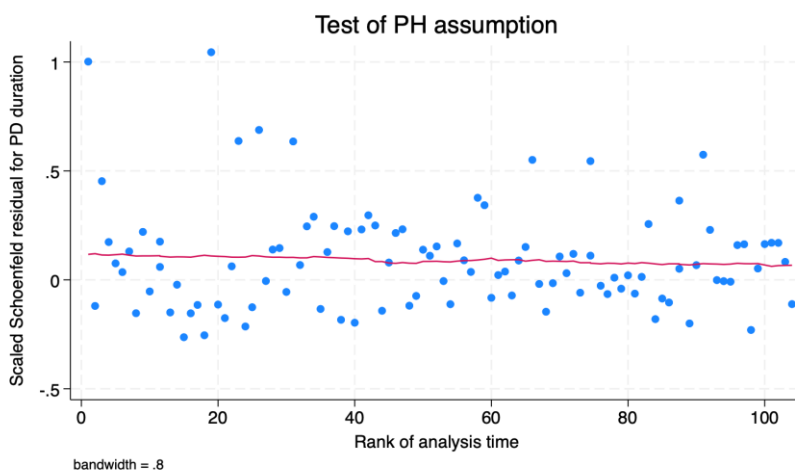

Supplement figure 8. Scaled Schoenfeld residual plot for depression (WHO-5  $\leq 50$ )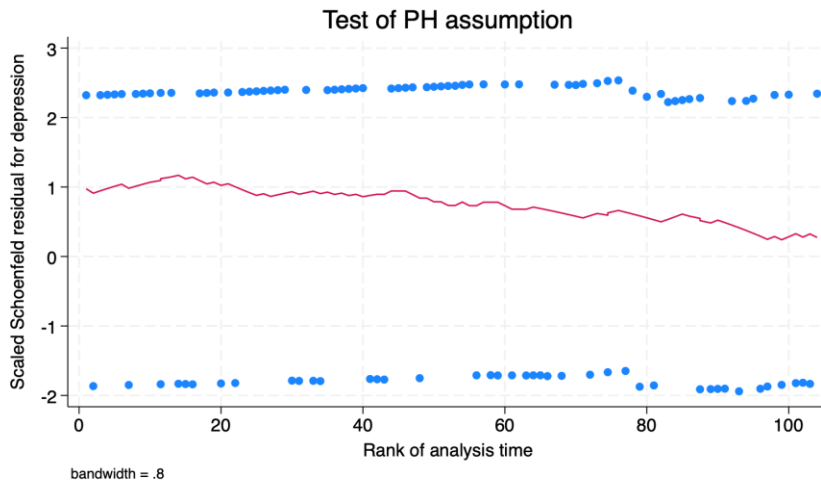

WHO-5: WHO-5 well-being scale.

Supplement figure 9. Scaled Schoenfeld residual plot for daily or almost daily naps

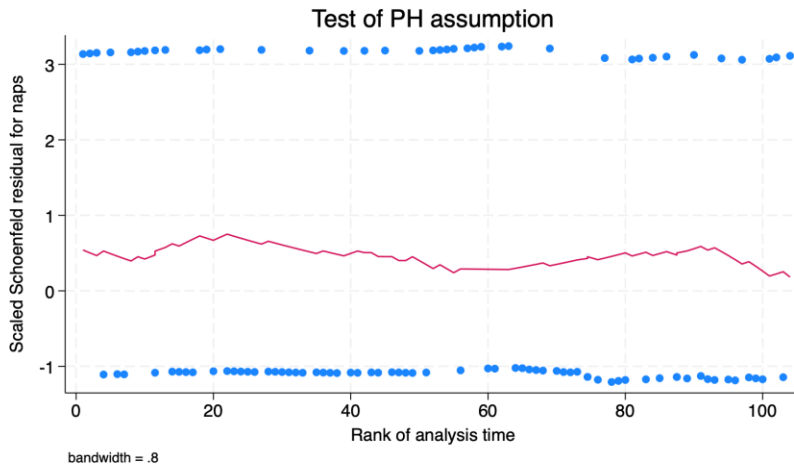

Supplement figure 10. Scaled Schoenfeld residual plot for morningness – eveningness

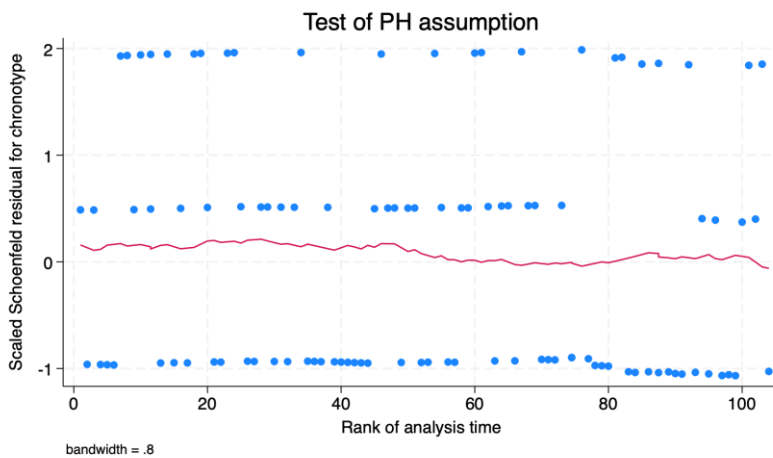

Supplement figure 11. Scaled Schoenfeld residual plot for physical activity

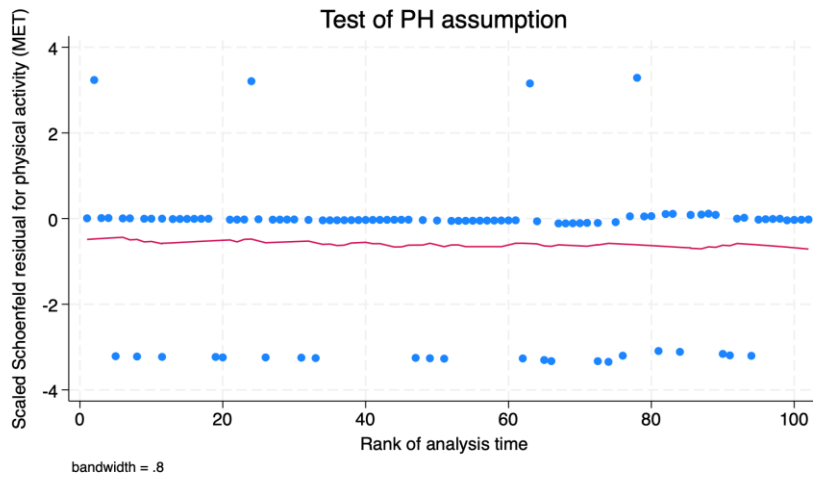

Supplement figure 12. Margins plot with different categories of sleep duration

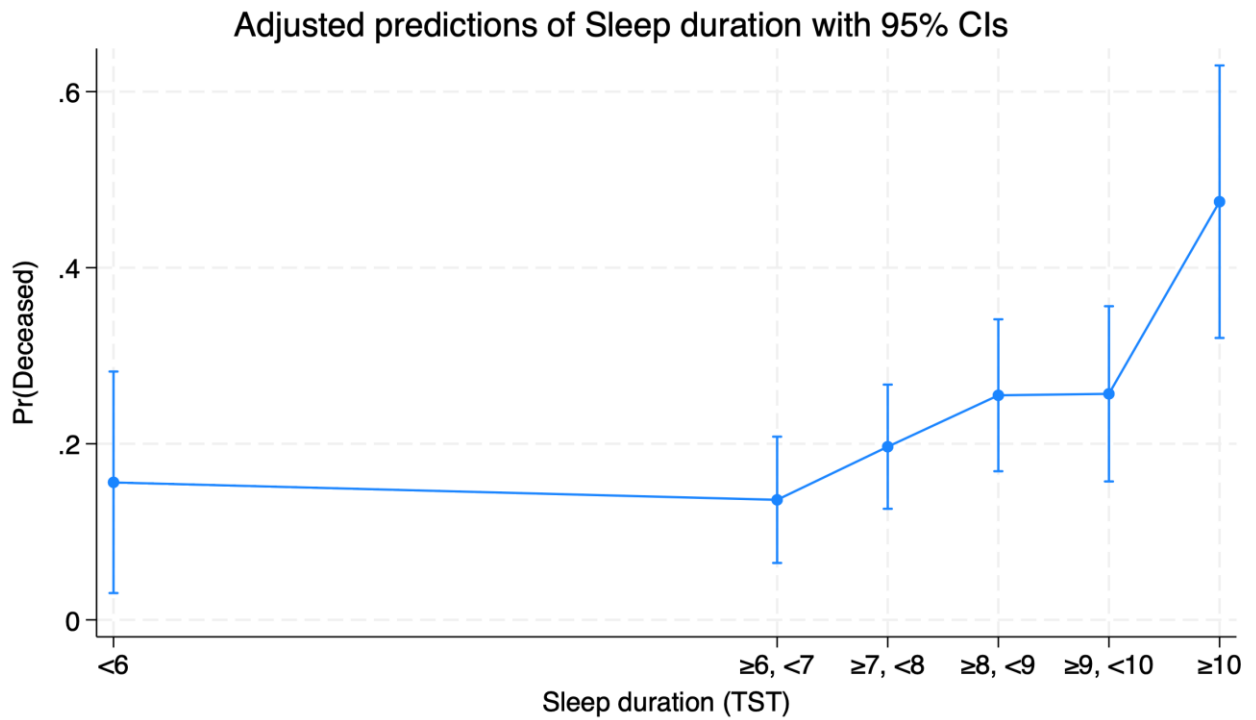

Supplement: Supplementary file 1 [file 568358%20Supplementary%20Material.pdf]
